# Supplementary material for: The optical properties of the stratospheric aerosol layer perturbation of the Hunga Tonga–Hunga Ha'apai volcano eruption of 15 January 2022
Source: Copernicus journal article supplement (doi:10.5194/acp-25-6353-2025), 2025-06-26
Supplement: Supplementary file 1 [file acp-25-6353-2025-supplement.zip]

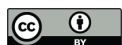

*Supplement of*

**The optical properties of the stratospheric aerosol layer perturbation of the Hunga Tonga–Hunga Ha’apai volcano eruption of 15 January 2022**

**Pasquale Sellitto et al.**

*Correspondence to:* Pasquale Sellitto ([pasquale.sellitto@lisa.ipsl.fr](mailto:pasquale.sellitto@lisa.ipsl.fr))

- [acp-25-6353-2025-supplement-title-page.pdf](#)
- [Hunga\\_optical\\_properties\\_ecrad.nc](#)
- [Hunga\\_optical\\_properties\\_hummel.zip](#)
- [Hunga\\_optical\\_properties\\_supplementary\\_figure.pdf](#)

The copyright of individual parts of the supplement might differ from the article licence.
