# Supplementary material for: The optical properties of the stratospheric aerosol layer perturbation of the Hunga Tonga–Hunga Ha'apai volcano eruption of 15 January 2022
Source: Copernicus journal article supplement (doi:10.5194/acp-25-6353-2025), 2025-06-26
Supplement: Supplementary file 2 [file acp-25-6353-2025-supplement.zip]

Supplements of “The optical properties of stratospheric aerosol layer perturbation of the Hunga volcano eruption of January 15th, 2022”, Sellitto et al.

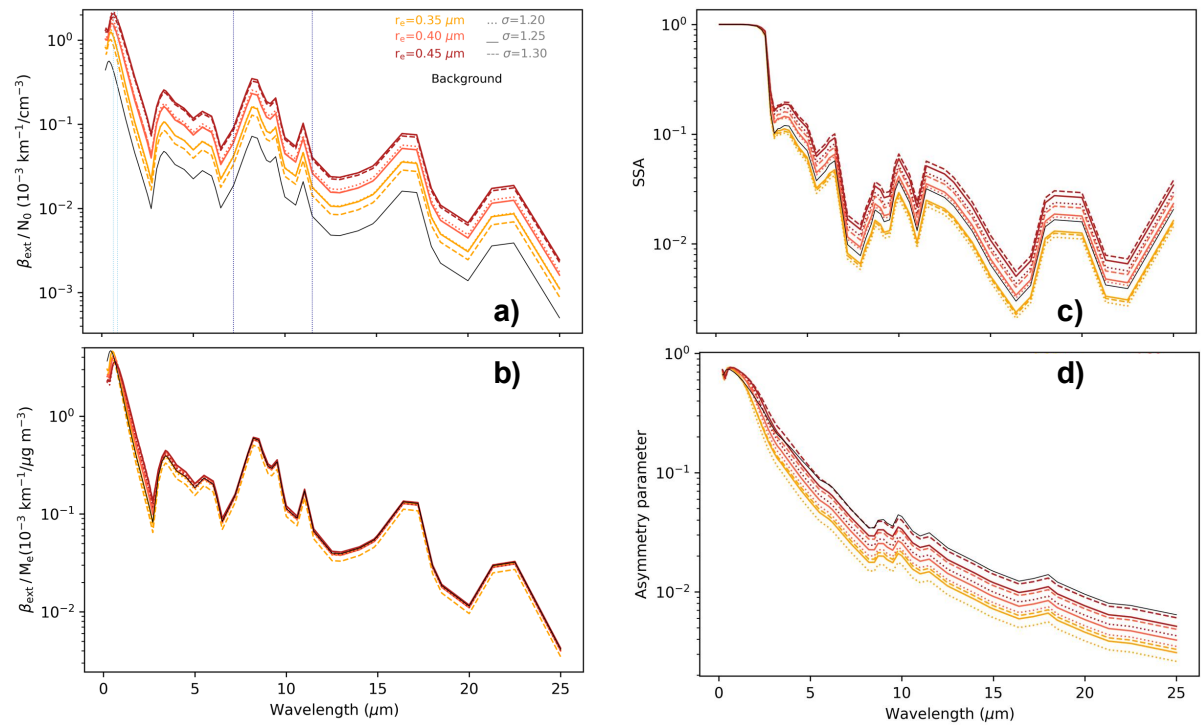

Figure S1: Same as Figs. 4 and 5 but in a log-scale ordinate axis.
